# Transcriptional Regulatory Networks in Response to Abiotic Stresses in Arabidopsis and Grasses<sup>1</sup>

Kazuo Nakashima, Yusuke Ito, and Kazuko Yamaguchi-Shinozaki\*

Biological Resources Division, Japan International Research Center for Agricultural Sciences, Ibaraki 305–8686, Japan (K.N., Y.I., K.Y.-S.); and Laboratory of Plant Molecular Physiology, Graduate School of Agricultural and Life Sciences, University of Tokyo, Tokyo 113–8657, Japan (K.Y.-S.)

Various abiotic stresses such as drought, high salinity, high temperature, and low temperature negatively impact plant growth and productivity of crops. Plants have adapted to respond to these stresses at the molecular, cellular, physiological, and biochemical level, enabling them to survive. Various adverse environmental stresses induce the expression of a variety of genes in many plant species (Xiong et al., 2002; Shinozaki et al., 2003; Bartels and Sunkar, 2005). Numerous stress-induced genes have been identified using microarray experiments (Kreps et al., 2002; Seki et al., 2002). The products of these genes are thought to promote stress tolerance and to regulate gene expression through signal transduction pathways (Xiong et al., 2002; Shinozaki et al., 2003).

Abscisic acid (ABA) is produced under water deficit conditions and plays an important role in the stress response and tolerance of plants to drought and high salinity. Exogenous application of ABA induces a number of genes that respond to dehydration and cold stress (Zhu, 2002; Shinozaki et al., 2003). Several reports have characterized genes that are induced by dehydration and cold stress, but do not respond to exogenous application of ABA in Arabidopsis (*Arabidopsis thaliana*; Zhu, 2002; Yamaguchi-Shinozaki and Shinozaki, 2006). This suggests the existence of ABA-independent and ABA-dependent signal transduction pathways that convert the initial stress signal into cellular responses. To better understand the molecular mechanisms regulating gene expression in response to abiotic stresses, including dehydration and cold stress, studies have initially focused on the analysis of Arabidopsis cis- and trans-acting elements and their role in mediating stress responses (Yamaguchi-Shinozaki and Shinozaki, 2006). Recently, abiotic stress-inducible genes and their cis- and trans-acting elements were

also studied in rice (*Oryza sativa*), a preferred crop plant to study stress responses because of its commercial value, relatively small genome size (approximately 430 Mb), diploid origin ( $2x = 24$ ), and close relationship to other important cereal crops.

Transcription factors (TFs) are master regulators that control gene clusters. A single TF can control the expression of many target genes through specific binding of the TF to the cis-acting element in the promoters of respective target genes. This type of transcriptional regulatory system is called regulon. Several major regulons that are active in response to abiotic stress have been identified in Arabidopsis. Dehydration-responsive element binding protein 1 (DREB1)/C-repeat binding factor (CBF) and DREB2 regulons function in ABA-independent gene expression, whereas the ABA-responsive element (ABRE) binding protein (AREB)/ABRE binding factor (ABF) regulon functions in ABA-dependent gene expression (Fig. 1). In addition to these major pathways, other regulons, including the NAC and MYB/MYC regulons, are involved in abiotic stress-responsive gene expression. Recent studies demonstrated that DREB1/CBF, DREB2, AREB/ABF, and NAC regulons have important roles in response to abiotic stresses in rice (Fig. 1). In this article, we focus on the regulation of gene expression in response to dehydration, high salinity, cold, and heat stresses, with particular emphasis on the role of DREB1/CBF, DREB2, AREB/ABF, and NAC regulons in grasses, including important crops such as rice, wheat (*Triticum aestivum*), maize (*Zea mays*), and barley (*Hordeum vulgare*), in comparison to Arabidopsis. For a more comprehensive overview on the very complex signal transduction pathways controlling abiotic stress responses, we refer the reader to the many excellent review articles that have recently been published (Chinnusamy et al., 2004; Bartels and Sunkar, 2005; Sunkar et al., 2007).

## DREB1/CBF AND DREB2 REGULONS

### Identification and Expression of DREB1/CBF and DREB2 in Arabidopsis

The dehydration-responsive element (DRE) containing the core sequence A/GCCGAC was identified as an ABA-independent cis-acting element important for

<sup>1</sup> This work was supported by project grants from the Ministry of Agriculture, Forestry and Fisheries, Japan, and grants-in-aid from the Ministry of Education, Culture, Sports, Science and Technology, Japan.

\* Corresponding author; e-mail kazukoys@jircas.affrc.go.jp.

The author responsible for the distribution of materials integral to the findings presented in this article in accordance with the policy described in the Instructions for Authors ([www.plantphysiol.org](http://www.plantphysiol.org)) is: Kazuko Yamaguchi-Shinozaki (kazukoys@jircas.affrc.go.jp). [www.plantphysiol.org/cgi/doi/10.1104/pp.108.129791](http://www.plantphysiol.org/cgi/doi/10.1104/pp.108.129791)

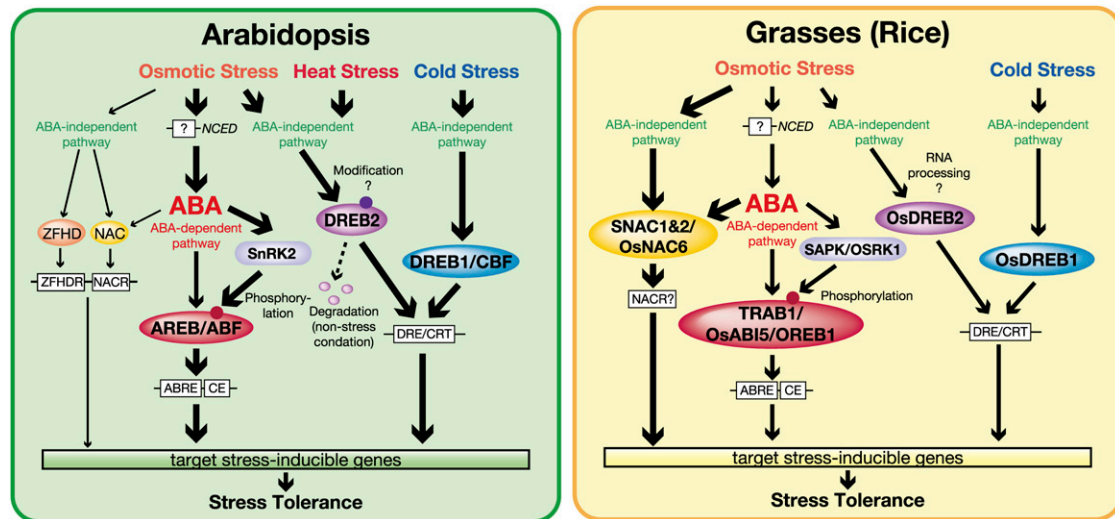

**Figure 1.** Major transcriptional regulatory networks of cis-acting elements and TFs involved in abiotic stress-responsive gene expression in Arabidopsis and grasses such as rice. TFs controlling stress-inducible gene expression are shown in ellipses. cis-Acting elements involved in stress-responsive transcription are shown in white boxes. Protein kinases involved in phosphorylation of TFs are shown in light purple boxes. Small filled circles illustrate modifications of TFs, for example, through phosphorylation, in response to stress signals.

the regulation of gene expression in response to drought, high salinity, and cold stresses in Arabidopsis (Yamaguchi-Shinozaki and Shinozaki, 1994). Similar cis-acting elements, named C-repeat (CRT) and low-temperature-responsive element, both containing the DRE core motif, are present in cold-inducible genes (Baker et al., 1994; Jiang et al., 1996). DRE/CRTs were identified in many promoters of stress-inducible genes from various plants, including Arabidopsis and grasses. The Arabidopsis cDNAs encoding DREB1/CBF and DREB2 were isolated using yeast one-hybrid screening (Stockinger et al., 1997; Liu et al., 1998). These proteins contain APETALA2 (AP2)/ethylene-responsive element binding factor (ERF) motifs and specifically bind to the DRE/CRT sequence, thereby activating transcription of genes driven by the DRE/CRT sequence in Arabidopsis. The AP2/ERF motif is specific to plants and functions as a DNA-binding domain. The Arabidopsis genome contains six *DREB1/CBF* genes and eight *DREB2* genes (Sakuma et al., 2002), including *DREB1A*, *DREB1B*, and *DREB1C*, which are rapidly and transiently induced by cold, but not by dehydration and high-salinity stress (Liu et al., 1998; Fig. 1). By contrast, *DREB2A* and *DREB2B* genes are induced upon dehydration and high salinity, but not by cold stress (Liu et al., 1998; Nakashima et al., 2000; Fig. 1). Transcript levels of three other *DREB1*- and six other *DREB2*-related genes were low under these stress conditions (Sakuma et al., 2002). *DREB1A*, *DREB1B*, and *DREB1C* proteins are major TFs required for cold-inducible gene expression, whereas the Arabidopsis *DREB2A* and *DREB2B* are major TFs required for high salinity- and drought-inducible gene expression, respectively. However, *CBF4/DREB1D*, *DREB1E/*

*DDF2*, and *DREB1F/DDF1* are weakly induced by osmotic stress, suggesting the existence of cross talk between the *DREB1/CBF* and the *DREB2* pathways under osmotic stresses (Haake et al., 2002; Sakuma et al., 2002; Magome et al., 2004).

#### The *DREB1/CBF* Regulon in Response to Cold Stress in Arabidopsis

Transgenic Arabidopsis plants overexpressing *DREB1B/CBF1* or *DREB1A/CBF3* under control of the cauliflower mosaic virus (CaMV) 35S promoter showed strong tolerance to drought, high salinity, and freezing (Jaglo-Ottosen et al., 1998; Liu et al., 1998; Kasuga et al., 1999), suggesting that DREBs/CBFs target multiple genes. In fact, more than 40 target genes of *DREB1/CBF* have been identified using both cDNA and GeneChip microarrays (Seki et al., 2001; Fowler and Thomashow, 2002; Maruyama et al., 2004). Most of those target genes contained the DRE/CRT or related core motifs in their promoters (Maruyama et al., 2004). Examples of the target genes include TFs, phospholipase C, an RNA-binding protein, a sugar transport protein, a desaturase, carbohydrate metabolism-related proteins, LEA (late embryogenesis abundant) proteins, KIN (cold-inducible) proteins, osmoprotectant biosynthesis proteins, and protease inhibitors. Most of the target proteins are known to function in response to stress and are thought to be responsible for the observed stress tolerance of the transgenic overexpressor lines. In fact, the transgenic plants overexpressing *DREB1A/CBF3* accumulated osmoprotectants, such as Pro and various sugars, under control (i.e. non-stress condition; Gilmour et al., 2000).

However, overexpression of DREB1/CBF also caused severe growth retardation under optimal growth conditions. To overcome the negative impact on growth and development, the stress-inducible *RD29A* promoter instead of the strong constitutive CaMV 35S promoter was used for overexpression of *DREB1A* (Kasuga et al., 1999).

### DREB1/CBF Regulon in Response to Cold Stress in Grasses

*DREB1/CBF*-homologous genes were identified in various grasses such as rice, wheat, diploid wheat (*Triticum monococcum*), barley, wild barley (*Hordeum spontaneum*), maize, sorghum (*Sorghum bicolor*), rye (*Secale cereale*), oat (*Avena sativa*), and perennial ryegrass (*Lolium tremulentum*; Dubouzet et al., 2003; Xue, 2003; Qin et al., 2004; Bräutigam et al., 2005; Skinner et al., 2005; Vágújfalvi et al., 2005; Xiong and Fei, 2006; James et al., 2008; Zhao and Bughrara, 2008). In rice, a low-temperature-sensitive cereal, four *DREB1/CBF* homologous genes, *OsDREB1A*, *OsDREB1B*, *OsDREB1C*, and *OsDREB1D*, have been isolated (Dubouzet et al., 2003). The *DREB1/CBF*-type TF ZmDREB1A was also identified in maize (Qin et al., 2004). Skinner et al. (2005) reported that barley, a diploid Triticeae model and a low-temperature-tolerant cereal, contains a large *DREB1/CBF* family consisting of at least 20 genes (*HvCBFs*). The increase in size and complexity of the barley *DREB1/CBF* family might be derived from the genome size (barley, 5 Gb; rice, 430 Mb; Arabidopsis, 145 Mb). Most of these *DREB1* genes showed a rapid response to cold stress (Fig. 1). Overexpression of *DREB1/CBF* homologous genes from rice, maize, barley, perennial ryegrass, and wheat in transgenic Arabidopsis or tobacco (*Nicotiana tabacum*) plants resulted in growth retardation and in overexpression of stress-inducible genes downstream of Arabidopsis *DREB1A* under non-stress conditions. Furthermore, these overexpressor lines exhibited tolerance to abiotic stresses such as drought and freezing (Dubouzet et al., 2003; Qin et al., 2004; Skinner et al., 2005; Xiong and Fei, 2006; Zhao and Bughrara, 2008). These results suggest that the *DREB1/CBF* genes from various grasses can function as TFs similar to the Arabidopsis *DREB1A* TF.

Several *DREB1/CBFs* were overexpressed in various grasses such as rice, wheat, tall fescue (*Festuca grandinacea*), and bahiagrass (*Paspalum notatum*; Lee et al., 2004; Pellegrineschi et al., 2004; Oh et al., 2005; Ito et al., 2006; Zhao et al., 2007; James et al., 2008). These transgenic plants showed tolerance to drought, high salinity, or cold stress. In transgenic rice plants, some downstream genes were induced under control conditions by overexpression of Arabidopsis *DREB1B/CBF1*, *DREB1A/CBF3*, or rice *OsDREB1A* (Lee et al., 2004; Oh et al., 2005; Ito et al., 2006). Transgenic rice constitutively overexpressing Arabidopsis *DREB1A* accumulated osmoprotectants, including Pro and various sugars, under control conditions (Ito et al., 2006). Transgenic tall fescue, which contained *DREB1A* driven by the stress-inducible *RD29A* promoter, accu-

mulated a significantly higher level of Pro under drought conditions than control plants (Zhao et al., 2007). These data suggest that the *DRE/DREB1* regulon exists in a variety of grasses and can be used to improve tolerance to drought, high salinity, and cold stresses by gene transfer in economically important cereals. Interestingly, an *Fr-A<sup>m</sup>2* or *Fr-H2* locus was identified as a quantitative trait locus that functions in tolerance to cold stress. Some *DREB1/CBF* genes map to these loci in diploid wheat and barley, respectively (Vágújfalvi et al., 2005; Francia et al., 2007). In addition, mRNA levels of the *DREB1/CBF* genes within the *Fr-A<sup>m</sup>2* or *Fr-H2* locus correlated with frost resistance (Vágújfalvi et al., 2005; Stockinger et al., 2007).

Taken together, the *DREB1/CBF* regulon responds to cold stress and functions in stress tolerance without posttranscriptional modification in most grasses. Therefore, induction of the *DREB1/CBF* genes in response to cold appears to be important for regulation of this regulon (Fig. 1).

### DREB2 Regulon in Response to Osmotic and Heat Stress in Arabidopsis

The *DREB2A* gene was isolated as a gene encoding a DRE/CRT-binding protein and was shown to be induced by osmotic stresses (Liu et al., 1998). However, investigations studying the function of *DREB2* genes did not proceed as rapidly as those analyzing the role of *DREB1* genes because overexpression of *DREB2A* did not result in any phenotypic changes in transgenic plants (Liu et al., 1998). Domain analysis of *DREB2A* using Arabidopsis protoplasts revealed that the central region of *DREB2A* contains a negative regulatory domain and that deletion of this region makes *DREB2A* constitutively active (*DREB2A-CA*). Overexpression of *DREB2A-CA* in transgenic Arabidopsis induced expected phenotypic changes, including dwarfism, up-regulation of many stress-inducible downstream genes, and drought tolerance. When *DREB2A-CA* protein was fused to GFP, stable expression (i.e. green fluorescence) was observed in the nucleus. However, full-length *DREB2A* proteins fused to GFP protein were not stable in the nuclei of transgenic Arabidopsis plants, suggesting that the central region of *DREB2A* is required for regulation of the stability of *DREB2A* proteins. *DREB2A* protein degradation is thought to be mediated by DRIPs (*DREB2A*-interacting protein, C3HC4 RING domain-containing proteins), which bind to *DREB2A*. DRIP proteins function as E3 ubiquitin ligases and are capable of mediating *DREB2A* ubiquitination, as was revealed in an in vitro ubiquitination assay (Qin et al., 2008).

Although *DREB2A* was isolated together with *DREB1A* (Liu et al., 1998), it was found that some *DREB2A* downstream target genes were different from those of *DREB1A*. The reason for this probably lies in the fact that the DNA-binding specificity of *DREB2A* slightly differs from that of *DREB1A*. Specifically, *DREB1A* has a high affinity to A/GCCGACNT sequences, whereas

DREB2A preferentially binds ACCGAC motifs (Sakuma et al., 2006a). Overexpression of *DREB2A-CA* also induced expression of heat shock (HS)-related genes and improved thermotolerance in transgenic plants (Sakuma et al., 2006b). Furthermore, overexpression of *DREB2C* was found to induce the expression of many HS stress-inducible genes, resulting in thermotolerance in transgenic Arabidopsis (Lim et al., 2007). Collectively, these data indicate that DREB2 regulons function in both osmotic and HS stress responses (Fig. 1).

### DREB2 Regulons in Response to Dehydration and High Salinity in Grasses

*DREB2* homologous genes were isolated in grasses such as rice, wheat, barley, maize, and pearl millet (*Pennisetum glaucum*; Dubouzet et al., 2003; Shen et al., 2003; Xue and Loveridge, 2004; Egawa et al., 2006; Qin et al., 2007; Agarwal et al., 2007). Most of them respond to high salinity and drought (Fig. 1). The maize *ZmDREB2A* was responsive to high temperature, which was also shown for the Arabidopsis *DREB2A* gene (Qin et al., 2007). Wheat *TaDREB1*, wheat *WDREB2*, maize *ZmDREB2A*, and pearl millet *PgDREB2* are also responsive to cold stress, whereas Arabidopsis *DREB2A* and rice *OsDREB2A* are not (Dubouzet et al., 2003; Shen et al., 2003; Egawa et al., 2006; Agarwal et al., 2007; Qin et al., 2007). *DREB2* transcripts were shown to be regulated by alternative splicing in barley, wheat, and maize. Although nonfunctional forms of transcripts accumulated, functional forms of transcripts were induced by stress treatments (Xue and Loveridge, 2004; Egawa et al., 2006; Qin et al., 2007). Most of these *DREB2* proteins were reported to have transactivation abilities in yeast or plant cells. Although pearl millet *PgDREB2* preferably binds to the ACCGAC sequence as does *DREB2A*, the most preferred binding sequence of barley *HvDRF1* is TT/ACCGCCTT (Xue and Loveridge, 2004; Agarwal et al., 2007). *PgDREB2* was shown to be phosphorylated by total cell extracts and that the phosphorylated protein could not bind to DRE/CRT (Agarwal et al., 2007).

Although overexpression of rice *OsDREB2A* did not result in any phenotypic changes in transgenic Arabidopsis, overexpression of wheat *TaDREB1* and *WDREB2* and maize *ZmDREB2A* caused phenotypic changes in transgenic Arabidopsis and tobacco (Dubouzet et al., 2003; Shen et al., 2003; Kobayashi et al., 2007; Qin et al., 2007). For example, Arabidopsis overexpressing maize *ZmDREB2A* were dwarf, but exhibited improved tolerance to drought and heat stress as did transgenic Arabidopsis overexpressing *DREB2A-CA*. Microarray analysis revealed that 28 of 44 up-regulated genes in transgenic Arabidopsis overexpressing *ZmDREB2A* were also up-regulated in Arabidopsis overexpressing *DREB2A-CA*. Unfortunately, stress-tolerant grasses overexpressing *DREB2* have not yet been generated.

In conclusion, expression of *DREB2* genes is induced by dehydration and high salinity in grasses, while some *DREB2* genes respond to cold or heat

stress (Fig. 1). Stability of *DREB2* proteins is required for function in Arabidopsis, whereas RNA processing of *DREB2* genes is important in grasses (Fig. 1).

### AREB/ABF REGULON

#### ABRE and Coupling Elements for ABA-Mediated Responses

Many drought and high salinity-inducible genes respond to ABA in Arabidopsis and rice (Seki et al., 2002; Rabbani et al., 2003). Most ABA-inducible genes contain a conserved, ABA-responsive, cis-acting element, designated as ABRE (PyACGTGG/TC), in their promoter regions. ABRE is a major cis-acting element in ABA-responsive genes (Fig. 1). For ABA-dependent transcription, a single copy of ABRE is not sufficient. Rather, ABRE and coupling elements, including coupling element 1 (CE1) and coupling element 3 (CE3), constitute an ABA-responsive complex in the regulation of wheat *HVA1* and *HVA22* genes (Shen et al., 1996). Most known coupling elements are similar to ABREs. For example, rice contains an A/GCGT motif (Hobo et al., 1999a). In Arabidopsis, the DRE/CRT sequence may serve as a coupling element of ABRE in response to ABA (Narusaka et al., 2003), suggesting that the existence of the interaction between the *DREB* regulons and the ABRE-related regulons.

#### AREB/ABF Regulon in Response to ABA in Arabidopsis

Arabidopsis cDNAs encoding bZIP TFs, referred to as AREB or ABFs, were isolated using yeast one-hybrid screening (Choi et al., 2000; Uno et al., 2000). In the Arabidopsis genome, 75 distinct bZIP TFs exist and 13 members are classified as a subfamily of AREB/ABFs that contain four conserved domains (Bensmihen et al., 2002; Jakoby et al., 2002). Arabidopsis *AREB1/ABF2*, *AREB2/ABF4*, and *ABF3* are mainly expressed in response to dehydration and high salinity in vegetative tissues, but not in seeds (Fujita et al., 2005; Fig. 1). In contrast, Arabidopsis *ABI5*, *AREB3*, *AtDPBF2*, and *EEL* were expressed during seed maturation (Finkelstein and Lynch, 2000; Lopez-Molina and Chua, 2000; Bensmihen et al., 2002). Fujita et al. (2005) reported that transgenic Arabidopsis plants overexpressing the active form of *AREB1* showed ABA hypersensitivity and enhanced drought tolerance. In addition, eight genes representing two groups were up-regulated: LEA-class genes and ABA- and dehydration stress-inducible regulatory genes, including linker histone H1 and AAA ATPase.

ABA-responsive 42-kD kinases phosphorylate conserved regions of AREB/ABFs, which suggests that ABA-dependent phosphorylation may be involved in activation of AREB subfamily proteins (Uno et al., 2000). Activation of *AREB1* requires ABA-dependent posttranscriptional modification. ABA-activated 42-kD kinase activity phosphorylates Ser/Thr residues of R-X-X-S/T sites in the conserved regions of *AREB1*

(Furihata et al., 2006). Transgenic plants overexpressing the phosphorylated active form of AREB1 expressed many ABA-inducible genes, including *RD29B*, without ABA treatment (Furihata et al., 2006). Therefore, these results suggest that the ABA-dependent multisite phosphorylation of AREB1 regulates its own activation in plants and that phosphorylation- and dephosphorylation-regulated events are important for ABA signaling.

Several type-2 SNF1-related protein kinases (SnRK2-type), such as OST1/SRK2E in Arabidopsis (Mustilli et al., 2002; Yoshida et al., 2002), were identified as ABA-activated protein kinases. They were also shown to mediate the regulation of stomatal aperture and to function upstream of ABA-responsive gene expression. In Arabidopsis, nine of 10 SnRK2 are activated by hyperosmolarity and five of nine SnRK2 are activated by ABA (Boudsocq et al., 2004). Furihata et al. (2006) demonstrated that ABA-activated SnRK2 protein kinases, including SnRK2.2/SRK2D, SnRK2.3/SRK2I, and SnRK2.6/SRK2E, phosphorylate the AREB1 polypeptide. Recently, Fujii et al. (2007) demonstrated that two protein kinases, SnRK2.2/SRK2D and SnRK2.3/SRK2I, control responses to ABA in seed germination, dormancy, and seedling growth in Arabidopsis. The authors suggested that the mechanism of SnRK2.2 and SnRK2.3 action in ABA signaling involves the activation of ABRE-driven gene expression through phosphorylation of AREB/ABFs (Fig. 1).

#### AREB/ABF Regulon in Response to ABA in Grasses

The rice TRANSCRIPTION FACTOR RESPONSIBLE FOR ABA REGULATION1 (*TRAB1*) and barley *HvABI5* show high homology to AREB2/ABF4. Expression of *TRAB1* and *HvABI5* genes was detected in ABA-treated and drought-stressed seedlings, respectively (Hobo et al., 1999b; Casaretto and Ho, 2003; Xue and Loveridge, 2004; Fig. 1). *HvABI5* binds to cis-elements in the promoter region of *HVA1*, an ABA- and stress-responsive gene (Casaretto and Ho, 2003; Xue and Loveridge, 2004). *TRAB1* was shown to be phosphorylated rapidly in response to ABA in rice (Kagaya et al., 2002). The rice bZIP TF *OsABI5* was also isolated from rice panicles (Zou et al., 2008). Expression of *OsABI5* was induced by ABA and high salinity, but was down-regulated by drought and cold stress in seedlings (Fig. 1). Overexpression of *OsABI5* in rice conferred high sensitivity to salt stress. In contrast, down-regulation of *OsABI5* promoted stress tolerance, but resulted in decreased fertility of rice. These results suggest that *OsABI5* may regulate adaptation to stress and plant fertility. Recently, Nijhawan et al. (2008) surveyed the rice genome for bZIP family proteins and analyzed the expression of 89 *OsbZIP* genes. Their microarray analysis indicated that 26 genes were up-regulated and 11 genes were down-regulated under dehydration, salinity, and/or cold conditions. The transcript level of *TRAB1* (*OsbZIP66*; Hobo et al., 1999b) was up-regulated under dehydration and salt

stress. However, the *OsbZIP* TFs remain to be analyzed in the context of stress signaling.

Ten SnRK2 protein kinases were identified in rice. All family members are activated by hyperosmotic stress. Three genes of this family are also activated by ABA (Kobayashi et al., 2004). Rice ABA-activated SnRK2 can phosphorylate *TRAB1* (Kobayashi et al., 2005). Therefore, ABA-activated SnRK2 protein kinases phosphorylate and activate the AREB/ABF-type proteins in rice as well as Arabidopsis (Fig. 1). Recently, Chae et al. (2007) isolated a dehydration-inducible gene (designated *OSRK1*) that encodes a 41.8-kD protein kinase of the rice SnRK2 family. In vitro kinase assays demonstrated that *OSRK1* can phosphorylate both itself and generic substrates. *OREB1*, a rice ABRE-binding factor, was phosphorylated in vitro by *OSRK1* at multiple sites of different functional domains.

In summary, Arabidopsis and rice use similar AREB/ABF regulons in ABA-dependent gene expression during dehydration and high-salinity stresses (Fig. 1). Phosphorylation of AREB/ABF-type TFs by SnRK2 family kinases is important in ABA-dependent stress signaling networks (Fig. 1).

#### NAC REGULON

##### NAC Regulon in Response to Dehydration and High Salinity in Arabidopsis

There are additional gene expression pathways that are regulated through NAC TFs under dehydration stress in Arabidopsis (Fig. 1). Two different Arabidopsis cis-acting elements are necessary for induction of gene expression by dehydration in *EARLY RESPONSE TO DEHYDRATION1* (*ERD1*), which encodes a Clp protease regulatory subunit, ClpD (Nakashima et al., 1997; Simpson et al., 2003). Three cDNAs encoding NAC-like proteins, Arabidopsis NAC domain-containing proteins ANAC19 (AT1G52890), ANAC055 (ATNAC3, AT3G15500), and ANAC072 (RD26, AT4G27410), were isolated using yeast one-hybrid screening and were found to bind to one of the cis-elements in the *ERD1* promoter (Tran et al., 2004). Microarray analysis of transgenic plants overexpressing *ANAC019*, *ANAC055*, or *ANAC072/RD26* revealed that several stress-inducible genes were up-regulated, conferring significantly increased drought tolerance in the transgenic lines (Fujita et al., 2004; Tran et al., 2004). However, *ERD1* was not up-regulated in transgenic plants. Through one-hybrid screening, cDNAs encoding zinc-finger homeodomain (ZFHD) TFs that bind to the other cis-element in the *ERD1* promoter were isolated. One of these TFs, ZFHD1, was shown to function as a transcriptional activator in response to dehydration stress (Tran et al., 2007). When both NAC and ZFHD proteins were overproduced, *ERD1* expression increased, suggesting that both cis-acting elements are essential for the expression of *ERD1*. Note that, in Arabidopsis, NAC proteins function alone or act as transcriptional activators in cooperation with ZFHD proteins (Fig. 1).

## NAC Regulon for Dehydration, High Salinity, and Cold Stress in Grasses

The *OsNAC6* gene is a member of the NAC TF gene family in rice (Ohnishi et al., 2005; Nakashima et al., 2007). Expression of *OsNAC6* is induced by ABA and abiotic stresses, including cold, drought, and high salinity (Fig. 1). *OsNAC6* gene expression is also induced by jasmonic acid, wounding, and blast disease. *OsNAC6* was shown to function as a transcriptional activator that localizes to the nucleus. Transgenic rice plants overexpressing *OsNAC6* exhibited growth retardation and low grain yield. However, these transgenic rice plants had improved tolerance to dehydration and high salt stresses and were more tolerant to blast disease. It was found that stress-inducible promoters, such as the *OsNAC6* promoter, are more suitable for overexpression in order to minimize negative effects on plant growth in transgenic rice. Up-regulated genes in rice plants overexpressing *OsNAC6* contained many genes that were induced by abiotic and biotic stresses, as revealed by microarray analyses. This is supported by results of a transient transactivation assay that demonstrated that *OsNAC6* activates the expression of two genes, including a peroxidase-encoding gene. Collectively, these results suggest that *OsNAC6* functions as a transcriptional activator in response to abiotic and biotic stresses in plants. Recently, Hu et al. (2006, 2008) reported that overexpression of the stress-responsive genes *STRESS-RESPONSIVE NAC1* (*SNAC1*) and *SNAC2* enhance drought and salt tolerance in transgenic rice without growth retardation (Fig. 1). It should be noted that *SNAC1* was reported to enhance drought resistance in transgenic rice at the reproductive stage (22%–34% higher seed setting than control) when grown in the field under severe drought stress. These plants, however, were not affected in yield (Hu et al., 2006). Completion of the rice genome project revealed that the rice genome contains six paralogous genes, including *OsNAC6* and *SNAC1* (Ooka et al., 2003). Interestingly, one of the homologous genes, *ONAC010*, encodes a protein showing high similarity with the NAC protein, NAM-B1, regulating senescence, which was shown to improve grain protein, zinc, and iron content in wheat (Uauy et al., 2006).

These results indicate that, in contrast to Arabidopsis, the NAC regulon may have additional functions in grasses (Fig. 1). Therefore, comparative analysis of gene expression patterns, determining the functional role of these genes in growth and tolerance to abiotic and biotic stresses, and identification of target genes of TFs involved in stress responses are important future tasks.

## CONCLUSIONS AND PERSPECTIVES

Many plant genes are regulated in response to abiotic stresses, such as dehydration, high salinity, cold, and heat. These genes regulate responses to stress and are thought to be important for stress tolerance. Molecular and genetic studies provided

evidence that the dicot Arabidopsis and the monocot rice share common regulatory mechanisms of gene expression. TFs play important roles in the regulation of gene expression in response to abiotic stresses and most TFs are common between grasses and Arabidopsis (Fig. 1). TFs are powerful targets for genetic engineering of stress tolerance because overexpression of a single TF can lead to the up-regulation of a wide array of stress response genes that are controlled by the TF.

The grasses include many agriculturally important plants: major food crops such as rice, wheat, maize, and barley, forage crops such as ryegrass, and biomass/biofuel production species such as sugarcane (*Saccharum* sp.). Many TFs, including DREB1/CBF, DREB2, AREB/ABF, and NAC, can be used to improve stress tolerance to abiotic stresses in various grasses. However, several challenges have to be overcome when using TFs for genetic engineering of abiotic stress tolerance in grasses. First, an effective expression system, including suitable promoters, will be required for each grass because constitutive promoters are not always functional or can have negative effects on plant growth and development. Second, there is an urgent need to establish reliable systems to evaluate abiotic stress tolerance in transgenic grasses, especially under field conditions. Finally, the collective and cooperative efforts of plant molecular biologists, physiologists, and breeders are required to generate stress-tolerant grasses through genetic engineering. It is hoped that, in the future, these collective efforts and results of collaborative studies will positively contribute to sustainable food production in the world and will help to prevent global-scale environmental damage that results from abiotic stress.

Received September 10, 2008; accepted October 20, 2008; published January 7, 2009.

## LITERATURE CITED

- Agarwal P, Agarwal PK, Nair S, Sopory SK, Reddy MK (2007) Stress-inducible DREB2A transcription factor from *Pennisetum glaucum* is a phosphoprotein and its phosphorylation negatively regulates its DNA-binding activity. *Mol Genet Genomics* 277: 189–198
- Baker SS, Wilhelm KS, Thomashow MF (1994) The 5'-region of *Arabidopsis thaliana cor15a* has cis-acting elements that confer cold-, drought- and ABA-regulated gene expression. *Plant Mol Biol* 24: 701–713
- Bartels D, Sunkar R (2005) Drought and salt tolerance in plants. *Crit Rev Plant Sci* 24: 23–58
- Bensmihen S, Rippha S, Lambert G, Jublot D, Pautot V, Granier F, Giraudat J, Parcy F (2002) The homologous ABI5 and EEL transcription factors function antagonistically to fine-tune gene expression during late embryogenesis. *Plant Cell* 14: 1391–1403
- Boudsocq M, Barbier-Brygoo H, Lauriere C (2004) Identification of nine sucrose nonfermenting 1-related protein kinases 2 activated by hyperosmotic and saline stresses in *Arabidopsis thaliana*. *J Biol Chem* 279: 41758–41766
- Bräutigam M, Lindlof A, Zakhrebekova S, Gharti-Chhetri G, Olsson B, Olsson O (2005) Generation and analysis of 9792 EST sequences from cold acclimated oat, *Avena sativa*. *BMC Plant Biol* 5: 18
- Casaretto J, Ho TH (2003) The transcription factors HvABI5 and HvVP1 are required for the abscisic acid induction of gene expression in barley aleurone cells. *Plant Cell* 15: 271–284
- Chae MJ, Lee JS, Nam MH, Cho K, Hong JY, Yi SA, Suh SC, Yoon IS (2007) A rice dehydration-inducible SNF1-related protein kinase 2 phosphor-



- ylates an abscisic acid responsive element-binding factor and associates with ABA signaling. *Plant Mol Biol* **63**: 151–169
- Chinnusamy V, Schumaker K, Zhu JK** (2004) Molecular genetic perspectives on cross-talk and specificity in abiotic stress signalling in plants. *J Exp Bot* **55**: 225–236
- Choi H, Hong J, Ha J, Kang J, Kim SY** (2000) ABFs, a family of ABA-responsive element binding factors. *J Biol Chem* **275**: 1723–1730
- Dubouzet JG, Sakuma Y, Ito Y, Kasuga M, Dubouzet EG, Miura S, Seki M, Shinozaki K, Yamaguchi-Shinozaki K** (2003) *OsDREB* genes in rice, *Oryza sativa* L., encode transcription activators that function in drought-, high-salt- and cold-responsive gene expression. *Plant J* **33**: 751–763
- Egawa C, Kobayashi F, Ishibashi M, Nakamura T, Nakamura C, Takumi S** (2006) Differential regulation of transcript accumulation and alternative splicing of a *DREB2* homolog under abiotic stress conditions in common wheat. *Genes Genet Syst* **81**: 77–91
- Finkelstein RR, Lynch TJ** (2000) The *Arabidopsis* abscisic acid response gene *ABI5* encodes a basic leucine zipper transcription factor. *Plant Cell* **12**: 599–609
- Fowler S, Thomashow MF** (2002) *Arabidopsis* transcriptome profiling indicates that multiple regulatory pathways are activated during cold acclimation in addition to the CBF cold response pathway. *Plant Cell* **14**: 1675–1690
- Francia E, Barabaschi D, Tondelli A, Laidò G, Rizza F, Stanca AM, Busconi M, Fogher C, Stockinger EJ, Pecchioni N** (2007) Fine mapping of a *HvCBF* gene cluster at the frost resistance locus *Fr-H2* in barley. *Theor Appl Genet* **115**: 1083–1091
- Fujii H, Verslues PE, Zhu JK** (2007) Identification of two protein kinases required for abscisic acid regulation of seed germination, root growth, and gene expression in *Arabidopsis*. *Plant Cell* **19**: 485–494
- Fujita M, Fujita Y, Maruyama K, Seki M, Hiratsu K, Ohme-Takagi M, Tran LS, Yamaguchi-Shinozaki K, Shinozaki K** (2004) A dehydration-induced NAC protein, RD26, is involved in a novel ABA-dependent stress-signaling pathway. *Plant J* **39**: 863–876
- Fujita Y, Fujita M, Satoh R, Maruyama K, Parvez MM, Seki M, Hiratsu K, Ohme-Takagi M, Shinozaki K, Yamaguchi-Shinozaki K** (2005) AREB1 is a transcription activator of novel ABRE-dependent ABA-signaling that enhances drought stress tolerance in *Arabidopsis*. *Plant Cell* **17**: 3470–3488
- Furihata T, Maruyama K, Fujita Y, Umezawa T, Yoshida R, Shinozaki K, Yamaguchi-Shinozaki K** (2006) ABA-dependent multisite phosphorylation regulates the activity of a transcription activator AREB1. *Proc Natl Acad Sci USA* **103**: 1988–1993
- Gilmour SJ, Sebolt AM, Salazar MP, Everard JD, Thomashow MF** (2000) Overexpression of the *Arabidopsis* *CBF3* transcriptional activator mimics multiple biochemical changes associated with cold acclimation. *Plant Physiol* **124**: 1854–1865
- Haake V, Cook D, Riechmann JL, Pineda O, Thomashow MF, Zhang JZ** (2002) Transcription factor CBF4 is a regulator of drought adaptation in *Arabidopsis*. *Plant Physiol* **130**: 639–648
- Hobo T, Asada M, Koyama Y, Hattori T** (1999a) ACGT-containing abscisic acid response element (ABRE) and coupling element 3 (CE3) are functionally equivalent. *Plant J* **19**: 679–689
- Hobo T, Koyama Y, Hattori T** (1999b) A bZIP factor, TRAB1, interacts with VP1 and mediates abscisic acid-induced transcription. *Proc Natl Acad Sci USA* **96**: 15348–15353
- Hu H, Dai M, Yao J, Xiao B, Li X, Zhang Q, Xiong L** (2006) Overexpressing a NAM, ATAF, and CUC (NAC) transcription factor enhances drought resistance and salt tolerance in rice. *Proc Natl Acad Sci USA* **35**: 12987–12992
- Hu H, You J, Fang Y, Zhu X, Qi Z, Xiong L** (2008) Characterization of transcription factor gene *SNAC2* conferring cold and salt tolerance in rice. *Plant Mol Biol* **67**: 169–181
- Ito Y, Katsura K, Maruyama K, Tajiri T, Kobayashi M, Seki M, Shinozaki K, Yamaguchi-Shinozaki K** (2006) Functional analysis of rice *DREB1/CBF*-type transcription factors involved in cold-responsive gene expression in transgenic rice. *Plant Cell Physiol* **47**: 141–153
- Jaglo-Ottosen KR, Gilmour SJ, Zarka DG, Schabenberger O, Thomashow MF** (1998) *Arabidopsis* *CBF1* overexpression induces *COR* genes and enhances freezing tolerance. *Science* **280**: 104–106
- Jakoby M, Weisshaar B, Dröge-Laser W, Vicente-Carbajosa J, Tiedemann J, Kroj T, Parcy F, bZIP Research Group** (2002) bZIP transcription factors in *Arabidopsis*. *Trends Plant Sci* **7**: 106–111
- James VA, Neibaur I, Altpeter F** (2008) Stress inducible expression of the *DREB1A* transcription factor from xeric, *Hordeum spontaneum* L in turf and forage grass (*Paspalum notatum* Flugge) enhances abiotic stress tolerance. *Transgenic Res* **17**: 93–104
- Jiang C, Iu B, Singh J** (1996) Requirement of a CCGAC *cis*-acting element for cold induction of the *BN115* gene from winter *Brassica napus*. *Plant Mol Biol* **30**: 679–684
- Kagaya Y, Hobo T, Murata M, Ban A, Hattori T** (2002) Abscisic acid-induced transcription is mediated by phosphorylation of an abscisic acid response element binding factor, TRAB1. *Plant Cell* **14**: 3177–3189
- Kasuga M, Liu Q, Miura S, Yamaguchi-Shinozaki K, Shinozaki K** (1999) Improving plant drought, salt, and freezing tolerance by gene transfer of a single stress-inducible transcription factor. *Nat Biotechnol* **17**: 287–291
- Kobayashi F, Ishibashi M, Takumi S** (2007) Transcriptional activation of *Cor/Lea* genes and increase in abiotic stress tolerance through expression of a wheat *DREB2* homolog in transgenic tobacco. *Transgenic Res* **17**: 755–767
- Kobayashi Y, Murata M, Minami H, Yamamoto S, Kagaya Y, Hobo T, Yamamoto A, Hattori T** (2005) Abscisic acid-activated SNR2 protein kinases function in the gene-regulation pathway of ABA signal transduction by phosphorylating ABA response element-binding factors. *Plant J* **44**: 939–949
- Kobayashi Y, Yamamoto S, Minami H, Kagaya Y, Hattori T** (2004) Differential activation of the rice sucrose nonfermenting1-related protein kinase2 family by hyperosmotic stress and abscisic acid. *Plant Cell* **16**: 1163–1177
- Kreps JA, Wu Y, Chang HS, Zhu T, Wang X, Harper JF** (2002) Transcriptome changes for *Arabidopsis* in response to salt, osmotic, and cold stress. *Plant Physiol* **130**: 2129–2141
- Lee SC, Huh KW, An K, An G, Kim SR** (2004) Ectopic expression of a cold-inducible transcription factor, CBF1/DREB1b, in transgenic rice (*Oryza sativa* L.). *Mol Cells* **18**: 107–114
- Lim CJ, Hwang JE, Chen H, Hong JK, Yang KA, Choi MS, Lee KO, Chung WS, Lee SY, Lim CO** (2007) Over-expression of the *Arabidopsis* DRE/CRT-binding transcription factor *DREB2C* enhances thermotolerance. *Biochem Biophys Res Commun* **362**: 431–436
- Liu Q, Kasuga M, Sakuma Y, Abe H, Miura S, Yamaguchi-Shinozaki K, Shinozaki K** (1998) Two transcription factors, DREB1 and DREB2, with an EREBP/AP2 DNA binding domain, separate two cellular signal transduction pathways in drought- and low temperature-responsive gene expression, respectively, in *Arabidopsis*. *Plant Cell* **10**: 1391–1406
- Lopez-Molina L, Chua NH** (2000) A null mutation in a bZIP factor confers ABA-insensitivity in *Arabidopsis thaliana*. *Plant Cell Physiol* **41**: 541–547
- Magome H, Yamaguchi S, Hanada A, Kamiya Y, Oda K** (2004) *dwarf and delayed-flowering 1*, a novel *Arabidopsis* mutant deficient in gibberellin biosynthesis because of overexpression of a putative AP2 transcription factor. *Plant J* **37**: 720–729
- Maruyama K, Sakuma Y, Kasuga M, Ito Y, Seki M, Goda H, Shimada Y, Yoshida S, Shinozaki K, Yamaguchi-Shinozaki K** (2004) Identification of cold-inducible downstream genes of the *Arabidopsis* DREB1A/CBF3 transcriptional factor using two microarray systems. *Plant J* **38**: 982–993
- Mustilli AC, Merlot S, Vavasseur A, Fenzi F, Giraudat J** (2002) *Arabidopsis* OST1 protein kinase mediates the regulation of stomatal aperture by abscisic acid and acts upstream of reactive oxygen species production. *Plant Cell* **14**: 3089–3099
- Nakashima K, Kiyosue T, Yamaguchi-Shinozaki K, Shinozaki K** (1997) A nuclear gene, *erd1*, encoding a chloroplast-targeted Clp protease regulatory subunit homolog is not only induced by water stress but also developmentally upregulated during senescence in *Arabidopsis thaliana*. *Plant J* **12**: 851–861
- Nakashima K, Shinwari ZK, Sakuma Y, Seki M, Miura S, Shinozaki K, Yamaguchi-Shinozaki K** (2000) Organization and expression of two *Arabidopsis* *DREB2* genes encoding DRE-binding proteins involved in dehydration- and high-salinity-responsive gene expression. *Plant Mol Biol* **42**: 657–665
- Nakashima K, Tran LS, Van Nguyen D, Fujita M, Maruyama K, Todaka D, Ito Y, Hayashi N, Shinozaki K, Yamaguchi-Shinozaki K** (2007) Functional analysis of a NAC-type transcription factor *OsNAC6* involved in abiotic and biotic stress-responsive gene expression in rice. *Plant J* **51**: 617–630
- Narusaka Y, Nakashima K, Shinwari ZK, Sakuma Y, Furihata T, Abe H, Narusaka M, Shinozaki K, Yamaguchi-Shinozaki K** (2003) Interaction between two *cis*-acting elements, ABRE and DRE, in ABA-dependent

- expression of *Arabidopsis rd29A* gene in response to dehydration and high-salinity stresses. *Plant J* **34**: 137–148
- Nijhawan A, Jain M, Tyagi AK, Khurana JP (2008) Genomic survey and gene expression analysis of the basic leucine zipper transcription factor family in rice. *Plant Physiol* **146**: 333–350
- Oh SJ, Song SI, Kim YS, Jang HJ, Kim SY, Kim M, Kim YK, Nahm BH, Kim JK (2005) *Arabidopsis* CBF3/DREB1A and ABF3 in transgenic rice increased tolerance to abiotic stress without stunting growth. *Plant Physiol* **138**: 341–351
- Ohnishi T, Sugahara S, Yamada T, Kikuchi K, Yoshida Y, Hirano HY, Tsutsumi N (2005) *OsNAC6*, a member of the NAC gene family, is induced by various stresses in rice. *Genes Genet Syst* **80**: 135–139
- Ooka H, Satoh K, Doi K, Nagata T, Otomo Y, Murakami K, Matsubara K, Osato N, Kawai J, Carninci P, et al (2003) Comprehensive analysis of NAC family genes in *Oryza sativa* and *Arabidopsis thaliana*. *DNA Res* **20**: 239–247
- Pellegrineschi A, Reynolds M, Pacheco M, Brito RM, Almeraya R, Yamaguchi-Shinozaki K, Hoisington D (2004) Stress-induced expression in wheat of the *Arabidopsis thaliana* DREB1A gene delays water stress symptoms under greenhouse conditions. *Genome* **47**: 493–500
- Qin F, Kakimoto M, Sakuma Y, Maruyama K, Osakabe Y, Tran LS, Shinozaki K, Yamaguchi-Shinozaki K (2007) Regulation and functional analysis of *ZmDREB2A* in response to drought and heat stresses in *Zea mays* L. *Plant J* **50**: 54–69
- Qin F, Sakuma Y, Li J, Liu Q, Li YQ, Shinozaki K, Yamaguchi-Shinozaki K (2004) Cloning and functional analysis of a novel DREB1/CBF transcription factor involved in cold-responsive gene expression in *Zea mays* L. *Plant Cell Physiol* **45**: 1042–1052
- Qin F, Sakuma Y, Tran LS, Maruyama K, Kidokoro S, Fujita Y, Fujita M, Umezawa T, Sawano Y, Miyazono K, et al (2008) *Arabidopsis* DREB2A-interacting proteins function as RING E3 ligases and negatively regulate plant drought stress-responsive gene expression. *Plant Cell* **20**: 1693–1707
- Rabbani MA, Maruyama K, Abe H, Khan MA, Katsura K, Ito Y, Yoshiwara K, Seki M, Shinozaki K, Yamaguchi-Shinozaki K (2003) Monitoring expression profiles of rice genes under cold, drought, and high-salinity stresses and abscisic acid application using cDNA microarray and RNA gel-blot analyses. *Plant Physiol* **133**: 1755–1767
- Sakuma Y, Liu Q, Dubouzet JG, Abe H, Shinozaki K, Yamaguchi-Shinozaki K (2002) DNA-binding specificity of the ERF/AP2 domain of *Arabidopsis* DREBs, transcription factors involved in dehydration- and cold-inducible gene expression. *Biochem Biophys Res Commun* **290**: 998–1009
- Sakuma Y, Maruyama K, Osakabe Y, Qin F, Seki M, Shinozaki K, Yamaguchi-Shinozaki K (2006a) Functional analysis of an *Arabidopsis* transcription factor, DREB2A, involved in drought-responsive gene expression. *Plant Cell* **18**: 1292–1309
- Sakuma Y, Maruyama K, Qin F, Osakabe Y, Shinozaki K, Yamaguchi-Shinozaki K (2006b) Dual function of an *Arabidopsis* transcription factor DREB2A in water-stress-responsive and heat-stress-responsive gene expression. *Proc Natl Acad Sci USA* **103**: 18822–18827
- Seki M, Narusaka M, Abe H, Kasuga M, Yamaguchi-Shinozaki K, Carninci P, Hayashizaki Y, Shinozaki K (2001) Monitoring the expression pattern of 1300 *Arabidopsis* genes under drought and cold stresses by using a full-length cDNA microarray. *Plant Cell* **13**: 61–72
- Seki M, Narusaka M, Ishida J, Nanjo T, Fujita M, Oono Y, Kamiya A, Nakajima M, Enju A, Sakurai T, et al (2002) Monitoring the expression profiles of ca 7000 *Arabidopsis* genes under drought, cold and high-salinity stresses using a full-length cDNA microarray. *Plant J* **31**: 279–292
- Shen Q, Zhang P, Ho TH (1996) Modular nature of abscisic acid (ABA) response complexes: composite promoter units that are necessary and sufficient for ABA induction of gene expression in barley. *Plant Cell* **8**: 1107–1119
- Shen YG, Zhang WK, He SJ, Zhang JS, Liu Q, Chen SY (2003) An EREBP/AP2-type protein in *Triticum aestivum* was a DRE-binding transcription factor induced by cold, dehydration and ABA stress. *Theor Appl Genet* **106**: 923–930
- Shinozaki K, Yamaguchi-Shinozaki K, Seki M (2003) Regulatory network of gene expression in the drought and cold stress responses. *Curr Opin Plant Biol* **6**: 410–417
- Simpson SD, Nakashima K, Narusaka Y, Seki M, Shinozaki K, Yamaguchi-Shinozaki K (2003) Two different novel cis-acting elements of *erd1*, a *clpA* homologous *Arabidopsis* gene function in induction by dehydration stress and dark-induced senescence. *Plant J* **33**: 259–270
- Skinner JS, von Zitzewitz J, Szücs P, Marquez-Cedillo L, Filichkin T, Amundsen K, Stockinger EJ, Thomashow MF, Chen THH, Hayes PM (2005) Structural, functional, and phylogenetic characterization of a large CBF gene family in barley. *Plant Mol Biol* **59**: 533–551
- Stockinger EJ, Gilmour SJ, Thomashow MF (1997) *Arabidopsis thaliana* CBF1 encodes an AP2 domain-containing transcriptional activator that binds to the C-repeat/DRE, a cis-acting DNA regulatory element that stimulates transcription in response to low temperature and water deficit. *Proc Natl Acad Sci USA* **94**: 1035–1040
- Stockinger EJ, Skinner JS, Gardner KG, Francia E, Pecchioni N (2007) Expression levels of barley Cbf genes at the Frost resistance-H2 locus are dependent upon alleles at *Fr-H1* and *Fr-H2*. *Plant J* **51**: 308–321
- Sunkar R, Chinnusamy V, Zhu J, Zhu JK (2007) Small RNAs as big players in plant abiotic stress responses and nutrient deprivation. *Trends Plant Sci* **12**: 301–309
- Tran LS, Nakashima K, Sakuma Y, Osakabe Y, Qin F, Simpson SD, Maruyama K, Fujita Y, Shinozaki K, Yamaguchi-Shinozaki K (2007) Co-expression of the stress-inducible zinc finger homeodomain ZFHD1 and NAC transcription factors enhances expression of the *ERD1* gene in *Arabidopsis*. *Plant J* **49**: 6–63
- Tran LS, Nakashima K, Sakuma Y, Simpson SD, Fujita Y, Maruyama K, Fujita M, Seki M, Shinozaki K, Yamaguchi-Shinozaki K (2004) Isolation and functional analysis of *Arabidopsis* stress-inducible NAC transcription factors that bind to a drought-responsive cis-element in the early responsive to dehydration stress 1 promoter. *Plant Cell* **16**: 2481–2498
- Uauy C, Distelfeld A, Fahima T, Blechl A, Dubcovsky J (2006) A NAC gene regulating senescence improves grain protein, zinc, and iron content in wheat. *Science* **314**: 1298–1301
- Uno Y, Furihata T, Abe H, Yoshida R, Shinozaki K, Yamaguchi-Shinozaki K (2000) *Arabidopsis* basic leucine zipper transcription factors involved in an abscisic acid-dependent signal transduction pathway under drought and high-salinity conditions. *Proc Natl Acad Sci USA* **97**: 11632–11637
- Vágújfalvi A, Aprile A, Miller A, Dubcovsky J, Delugu G, Galiba G, Cattivelli L (2005) The expression of several Cbf genes at the *Fr-A2* locus is linked to frost resistance in wheat. *Mol Genet Genomics* **274**: 506–514
- Xiong L, Schumaker KS, Zhu JK (2002) Cell signaling during cold, drought, and salt stress. *Plant Cell (Suppl)* **14**: S165–S183
- Xiong Y, Fei SZ (2006) Functional and phylogenetic analysis of a DREB/CBF-like gene in perennial ryegrass (*Lolium perenne* L.). *Planta* **224**: 878–888
- Xue GP (2003) The DNA-binding activity of an AP2 transcriptional activator HvCBF2 involved in regulation of low-temperature responsive genes in barley is modulated by temperature. *Plant J* **33**: 373–383
- Xue GP, Loveridge CW (2004) *HvDRF1* is involved in abscisic acid-mediated gene regulation in barley and produces two forms of AP2 transcriptional activators, interacting preferably with a CT-rich element. *Plant J* **37**: 326–339
- Yamaguchi-Shinozaki K, Shinozaki K (1994) A novel cis-acting element in an *Arabidopsis* gene is involved in responsiveness to drought, low-temperature, or high-salt stress. *Plant Cell* **6**: 251–264
- Yamaguchi-Shinozaki K, Shinozaki K (2006) Transcriptional regulatory networks in cellular responses and tolerance to dehydration and cold stresses. *Annu Rev Plant Biol* **57**: 781–803
- Yoshida R, Hobo T, Ichimura K, Mizoguchi T, Takahashi F, Aronso J, Ecker JR, Shinozaki K (2002) ABA-activated SnRK2 protein kinase is required for dehydration stress signaling in *Arabidopsis*. *Plant Cell Physiol* **43**: 1473–1483
- Zhao H, Bughrara SS (2008) Isolation and characterization of cold-regulated transcriptional activator *LpCBF3* gene from perennial ryegrass (*Lolium perenne* L.). *Mol Genet Genomics* **279**: 585–594
- Zhao J, Ren W, Zhi D, Wang L, Xia G (2007) *Arabidopsis* DREB1A/CBF3 bestowed transgenic tall fescue increased tolerance to drought stress. *Plant Cell Rep* **26**: 1521–1528
- Zhu JK (2002) Salt and drought stress signal transduction in plants. *Annu Rev Plant Biol* **53**: 247–273
- Zou M, Guan Y, Ren H, Zhang F, Chen F (2008) A bZIP transcription factor, OsABI5, is involved in rice fertility and stress tolerance. *Plant Mol Biol* **66**: 675–683
